# Supplementary material for: GmGSTU23 Encoding a Tau Class Glutathione S-Transferase Protein Enhances the Salt Tolerance of Soybean (Glycine max L.)
Source: MDPI journal article supplement (doi:10.3390/ijms24065547), 2023-03-14
Supplement: s1 [file s1]

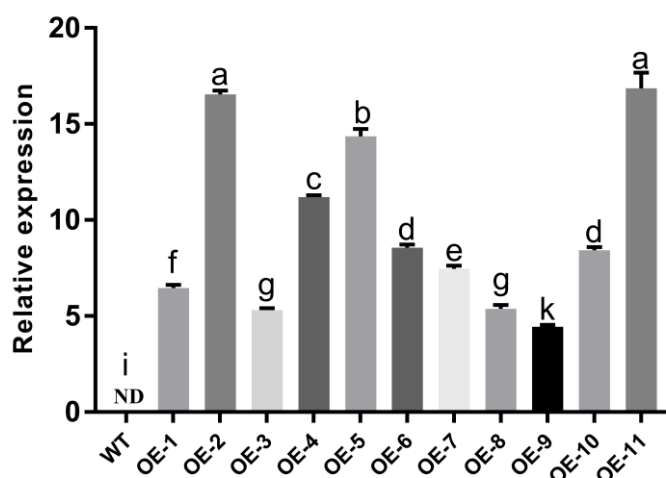

**Figure S1.** Generation and molecular confirmation of transgenic *Arabidopsis thaliana*. qRT-PCR identification of *GmGSTU23* transgenic *Arabidopsis* lines. WT: wild type; OE-1-OE-11: *GmGSTU23* transgenic *Arabidopsis* lines of T3 generation. ND: not detected. Data are means  $\pm$  SD of three biological replicates. Different letters in the column indicate significant differences among the treatments at  $p < 0.05$ .

**Table S1.** The sequencing information of *GmGSTU23*.

#### CDS:

ATGGCAGCTACTCAGGAAGATGTGAAGCTTTTGGGTATTGTGGGAAGCCCATTTGTGTG-  
CAGGGTCCAGATTGCCCTTAAGTTGAAGGGAGTTGAATACAAATTTTGGGAAGAAAATTTGGG-  
CAACAAGAGTGATTGCTTCTCAAATACAACCCTGTTCAACAAGAAGGTTCCAGTGTTT-  
GTTCAATGAGCAGCCCATAGCAGAGTCTCTTGTGATTGTTGAATACATTGATGAGA-  
CATGGAAGAACAACCCCATCTTACCTTCTGATCCTTACCAAAGAGCCTT-  
GGCTCGTTTCTGGTCCAAATTCATTGATGATAAGATTGTGGGTGCTG-  
TATCGAAATCTGTTTTACGGTTGATGAGAAAGAGCGTGAGAAGAATGTTGAAGAAACAT-  
ATGAGGCTCTTCAGTTTCTTGAGAATGAGCTGAAGGACAAGAAGTTTTTGGAGGAGAG-  
GAATTTGGGTGGTAGATATTGCTGCTGCTTCATAGCATTTTGGATCCCAATTTTTCAG-  
GAAATAGCAGGGTTCAGTTATTCACCAAGTGAGAAATTCCTATACTCTACAAATGGAGCCAA-  
GAATTCCTTAACCAACCCTTTTGTGCACGAAGTCCTTCCTCCTAGAGACCACTTTTGGC-  
TACTTCAAAGCCCGCTATGAAAGTCTTTCTGCTTCAAATA

#### cDNA:

ATGGCAGCTACTCAGGAAGATGTGAAGCTTTTGGGTATTGTGGGAAGCCCATTTGTGTG-  
CAGGGTCCAGATTGCCCTTAAGTTGAAGGGAGTTGAATACAAATTTTGGGAAGAAAATTTGGG-  
CAACAAGAGTGATTGCTTCTCAAATACAACCCTGTTCAACAAGAAGGTTCCAGTGTTT-  
GTTCAATGAGCAGCCCATAGCAGAGTCTCTTGTGATTGTTGAATACATTGATGAGA-  
CATGGAAGAACAACCCCATCTTACCTTCTGATCCTTACCAAAGAGCCTT-  
GGCTCGTTTCTGGTCCAAATTCATTGATGA-  
TAAGGTAACCTAACATTTCAAAAATCTTCTTAGTTTTCATGATTGTGCTGATTGTGCAG-  
CAAAACATCACGATGAAATCTATATATGTGAAATCTTTCTGGTGTG-  
GAATATATATGTGAAATCTTTGAATATGTAGAGAACTCAAAAGTCAACAGCCAACCATGAT-  
TTTTTTTAATGTATCAACTTTTGTAAACAATATTAGTGATT-  
GAACTTTATGGAATCATATACTATGATTTTGGGA-  
GAAATTTTATTTTATTTTACTATTTTATCTGGGTGGGGGATTCTGTCACGTATTTGTTTC-  
TATATACTCGATCTAAATCTGTTTGTCTTAATCACTTTATGAAATAATTACTAATAAA-  
TATTGTGATTGCGAAATCAGATTGTGGGTGCTGTATCGAAATCTGTTTTCACGGTTGATGA-  
GAAAGAGCGTGAGAAGAATGTTGAAGAAACATATGAGGCTCTTCAGTTTCTTGA-  
GAATGAGCTGAAGGACAAGAAGTTTTTGGAGGAGAGGAATTTGGGTGGTAGA-  
TATTGCTGCTGCTTCATAGCATTTTGGATCCCAATTTTTCAGGAAATAGCAGGGTTGCAG-  
TTATTCACCAAGTGAGAAATTCCTATACTCTACAAATGGAGCCAAGAATTCCTTAAC-

CACCCTTTTGTGCACGAAGTCCTTCCTCCTAGAGACCCACTTTTTGCCTACTTCAAAGCCCGC-  
TATGAAAGTCTTCTGCTTCAAAATAG

**Table S2.** Primers used in the study.

| Primer Name                  | Primer Sequence (5' to 3')                         | Purpose                   |
|------------------------------|----------------------------------------------------|---------------------------|
| Clone- <i>GmGSTU23</i> -F    | CGCATTCATACGCAGCAATCA                              | <i>GmGSTU23</i> Cloning   |
| Clone- <i>GmGSTU23</i> -R    | AGCAATAACTCAACAAGACACAAGT                          |                           |
| pTF101.1- <i>GmGSTU23</i> -F | gagaacacgggggactctagaATGGCAGCTACTCAGGAAGATGTG      | <i>GmGSTU23</i> -pTF101.1 |
| pTF101.1- <i>GmGSTU23</i> -R | cgatcggggaaattcgagctcCTATTTTGAAGCAGAAAGACTTTCATAGC |                           |
| Detect-F                     | CCTTCGCAAGACCCCTTCCTC                              | Molecular identification  |
| Detect-R                     | TCATCGCAAGACCGGCAAC                                |                           |
| Actin-F                      | GCACCACCGGAGAGAAAATA                               | qRT-PCR                   |
| Actin-R                      | GTGCACAATTGATGGACCAG                               |                           |
| q <i>GmGSTU23</i> - F        | GAGCAGCCCATAGCAGAGTC                               |                           |
| q <i>GmGSTU23</i> - R        | AGATTTTCGATACAGCACCCACA                            |                           |
